# Supplementary material for: Bowel Perforation in Vascular EDS: A Case Report and a Comprehensive Review of the Literature
Source: Preprints.org preprint supplement (doi:10.20944/preprints202307.0290.v1), 2023-07-05
Supplement: Supplementary file 2 [file supplementary]

**TABLE: All the reported cases in the literature of patients with Vascular Ehlers-Danlos Syndrome manifesting bowel perforations.**

|  | **Reference** | **Journal/Year** | **Age/Gender** | **Location of Bowel perforation** | **Management** | **Outcome** |
| --- | --- | --- | --- | --- | --- | --- |
| **1** | Edwin M. Sykes Jr. | 1984 | 35 & 26 F | Sigmoid | End Colostomy/ loop colostomy | - |
| **2** | Henry | Arch Pediat, 1995 | 5/11&13 F | Sigmoid/ colon twice | Colostomy/ colectomy | - |
| **3** | Habib et al | Ann R Coll Surg Engl, 2001 | 24 F | Right colon | Right hemicolectomy with a double-barrel stoma |  |
| **4** | Solan et al | Anesthesia 2004 | 31 F | Transverse colon | Loop colostomy at the perforation site |  |
| **5** | Sugawara | Surg Today 2004 | 19 F | Sigmoid | Hartmann’s |  |
| **6** | Fuchs and Fishman | J Pediatri Surg 2004 | 14 F | Sigmoid | Loop colostomy |  |
| **7** | Baichi et al | Dig Dis Sci 2005 | 48 F | Jejunum | Segmental resection |  |
| **8** | Bedda et al | Ann Chirurgie, 2006 | 23 M | Sigmoid | Loop colostomy |  |
| **9** | Demirogullari et al | J Pediatr Surg 2006 | 15 F | Sigmoid | Hartmann’s |  |
| **10** | Asherson et al | J rhumatol, 2006 | 16, M | Sigmoid | Temporary defunction, ingcolostomy |  |
| **11** | Blaker et al | Virchows Arch, 2007 | 42 F | Sigmoid | Sigmoidectomy | Anastomotic leak, liver hematoma, death |
| **12** |  |  | 21 M | Sigmoid | Hartmann’s | Good |
| **13** | Garvin et al | J Trauma, 2008 | 27 F | Sigmoid | Primary repair | MVA 4 years later, small bowel multiple perforations, resection and end ileostomy |
| **14** | Guyot et al | Br J Anaesth, 2009 | 7 M | Sigmoid | Laparotomy (-?) | Bleeding |
| **15** | Privitera et al | Surg Today 2009 | 35 F | Tranverse colon | Extended right hemicolectomy | Enterocutaneous fistula, splenic rupture, death |
| **16** | Leake et al | Cases J, 2010 | 53 F | Distal ileum | Segmental resection | Good |
| **17**  **18**  **19** | Surgey et al | Colorectal Dis | 29 F | Sigmoid | Hartmann’s | good |
|  | 23 F | Sigmoid | Hartmann’s | - |
|  | - F | Sigmoid | Hartmann’s | Good |
| **20** | Rana et al | J Med Case Rep, 2011 | 33 M | Sigmoid | Hartmann’s | Good |
| **21** | Omori et al | Surg Today, 2011 | 20 M | Sigmoid | Hartmann’s | Jejunal perforation, resection |
| **22** | Ng, Cheong | Asian J Surg, 2011 | 17 M | Sigmoid | Hartmann’s | - |
| **23**  **24** | Duthie et al | J Ped Surg, 2011 | 12 F | Proximal rectum | Perforation oversewn | Good |
| 13 M | Colon | - | Colon reperforation twice |
| **25** | Allaparthi et al | W J Gastrointest Endosc, 2013 | 23 F | Sigmoid | Colonic resection and ileostomy | Ileal perforation, bleeding |
| **26** | Shimaoka et al | J Dermatol, 2013 | 11 F | Colon | - | Colon perforation twice |
| **27** | Kashizaki et al | J Med Case Rep, 2013 | 64 F | - | Laparotomy & drainage | - |
| **28** | Eder et al | Experimental Dermatol, 2013 | 23 F | Jejunum | Segmental resection | Good |
| **29** | Sa et al | Surg Today, 2013 | 6 M | Sigmoid | Hartmann’s | Good |
| **30** | Anderson | Gastroenterology, 2014 | 48 F | Transverse colon | TAC & ileostomy | - |
| **31** | Yoneda et al | Case rep Gastroenterol, 2014 | 20 F | Sigmoid | Hartmann’s | - |
| **32** | Inokuchi et al | Medicine, 2014 | 24 M | Sigmoid | Hartmann’s | good |
| **33** | Nakagawa et al | Intern Med 2015 | 17 M | Colon | - | - |
| **34** | Masri et al | Techniques in Coloproctology, 2017 | 31 F | Sigmoid | Sigmoidectomy | reperforation |
| **35** | Our patient | ,2022 | 23 M | Sigmoid, multiple perforations of small intestine | Enterectomies | Enterocutaneous fistula, short intestine |
